# Supplementary material
Source: publisher site journal article supplement (https://www.dovepress.com/article/442186)
Supplement: Supplementary file 1 [file get_supplementary_file.php]

Supplementary Material


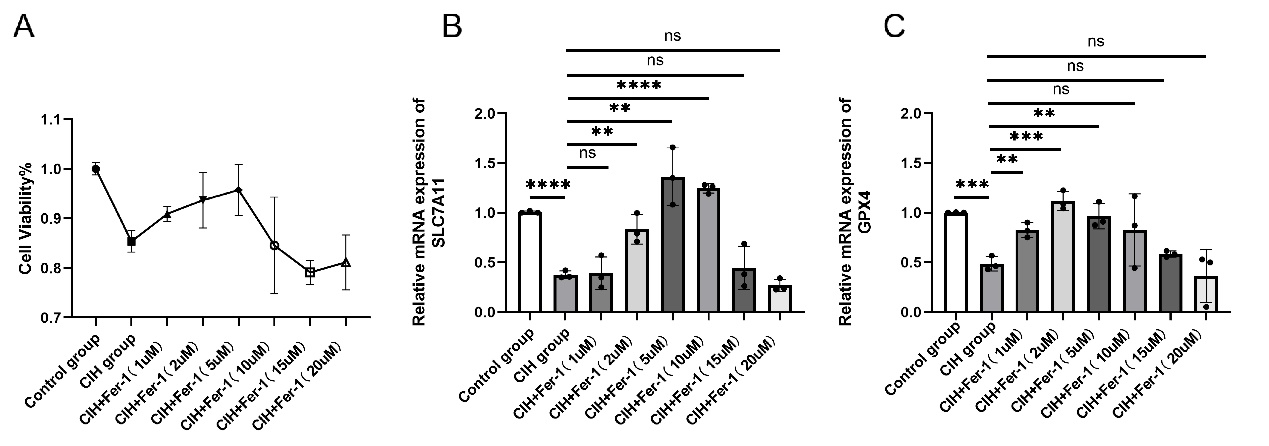


Figure S1. A, CCK-8 was used to screen the optimal concentration of Fer-1; B, The mRNA level of SLC7A11 was detected by qRT-PCR, used to screen the optimal concentration of Fer-1. C, The mRNA level of GPX4 was detected by qRT-PCR, used to screen the optimal concentration of Fer-1.


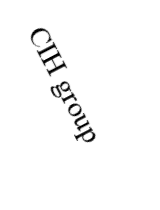

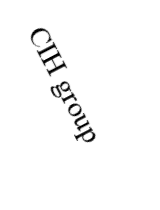

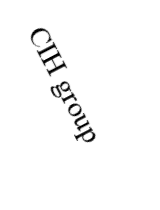

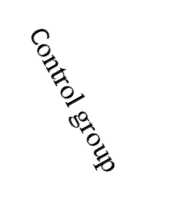

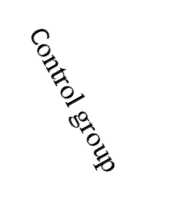

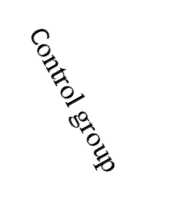

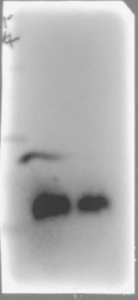

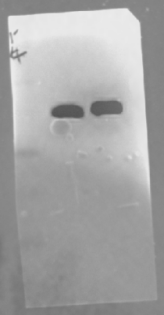

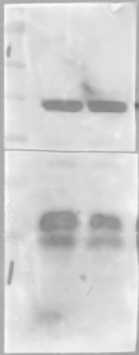

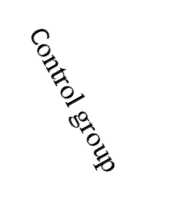

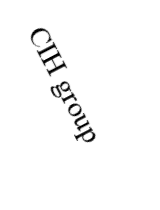

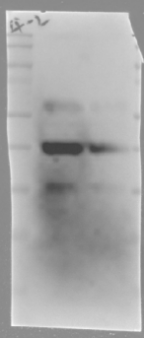

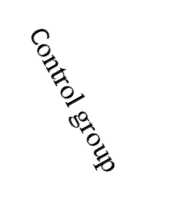

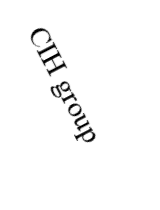

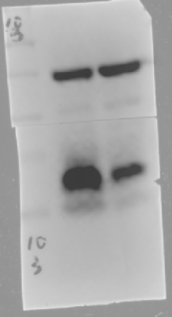

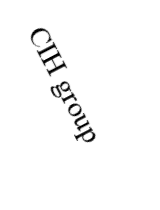

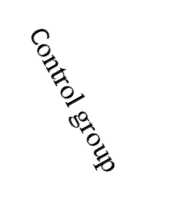

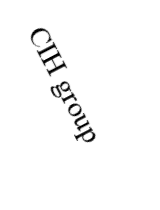

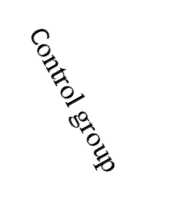

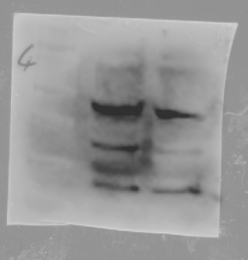

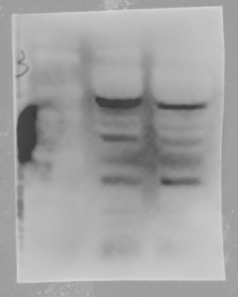

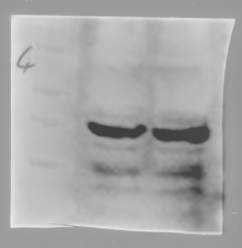

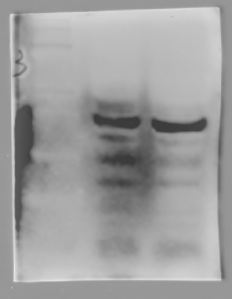

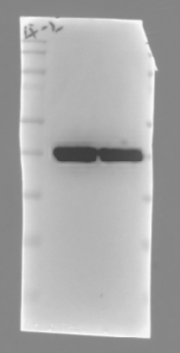


β-ACTIN

SLC7A11

Figure S2. Western blot images of Fig. 1F. The WB legends of ROAEC. The blots were cut prior to hybridisation with antibodies during blotting. The images show all blots and replicates of SLC7A11, GPX4, and β-actin. The inner black rectangles are the representative blots.

Second Repetition

First Repetition

Third

Repetition

42KD

55KD

17KD

β-ACTIN

GPX4

Third

Repetition

100

75

60

35

45

KD

15

25

First Repetition

Second Repetition


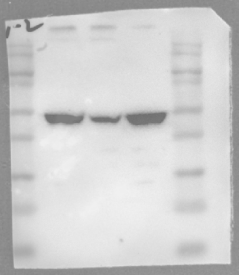

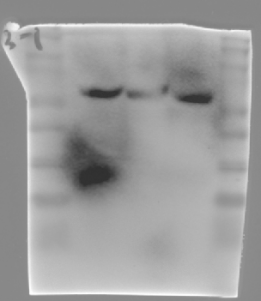

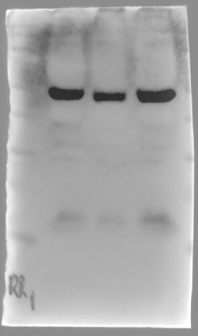

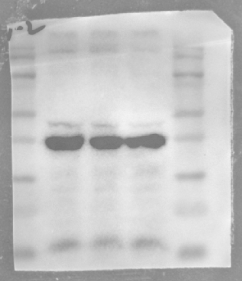

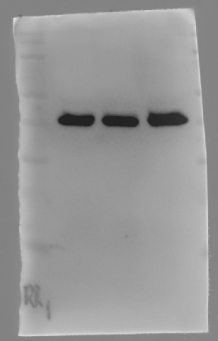

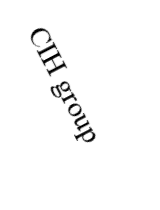

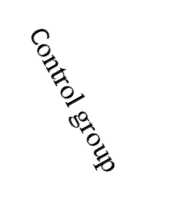

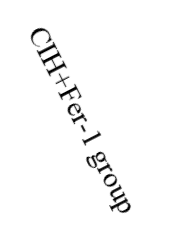

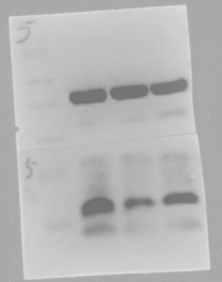

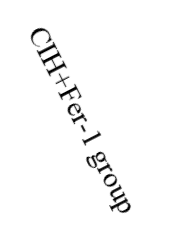

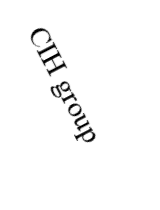

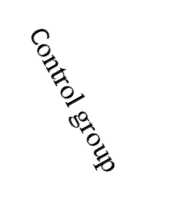

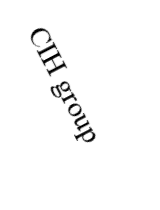

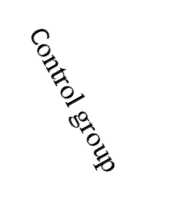

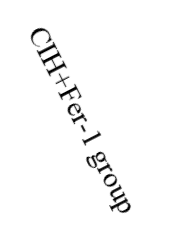

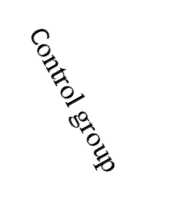

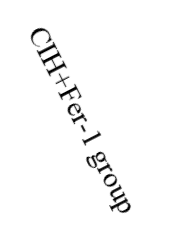

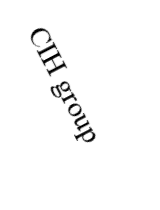

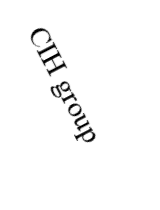

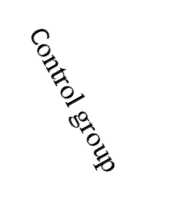

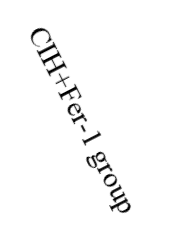

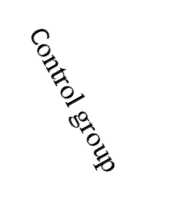

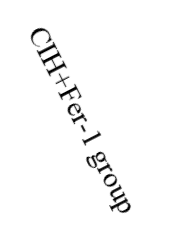

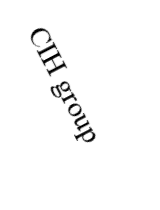

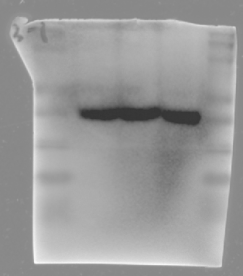

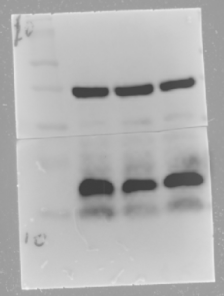

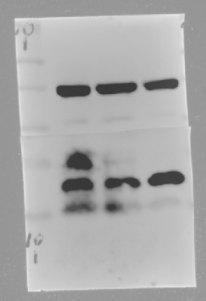


55KD

β-ACTIN

SLC7A11

GPX4

β-ACTIN

42KD

17KD

42KD

Third

Repetition

Third

Repetition

First Repetition

Second Repetition

First Repetition

Second Repetition

Figure S3. Western blot images of Fig.2F. The WB legends of ROAEC. The blots were cut prior to hybridisation with antibodies during blotting. The images show all blots and replicates of SLC7A11, GPX4, and β-actin. The inner black rectangles are the representative blots.
